# Supplementary material
Source: PubMed Central journal article supplement (PMC6016451)
Supplement: supp_RA117.000499_133237_3_supp_125967_p7r1yq.pdf [file supp_RA117.000499_133237_3_supp_125967_p7r1yq.pdf]

Figure S1

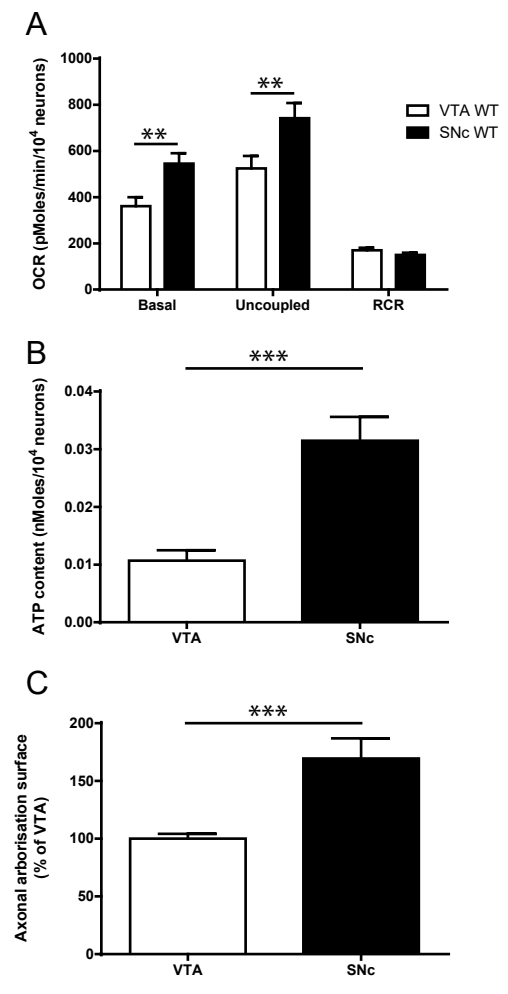

Figure S2

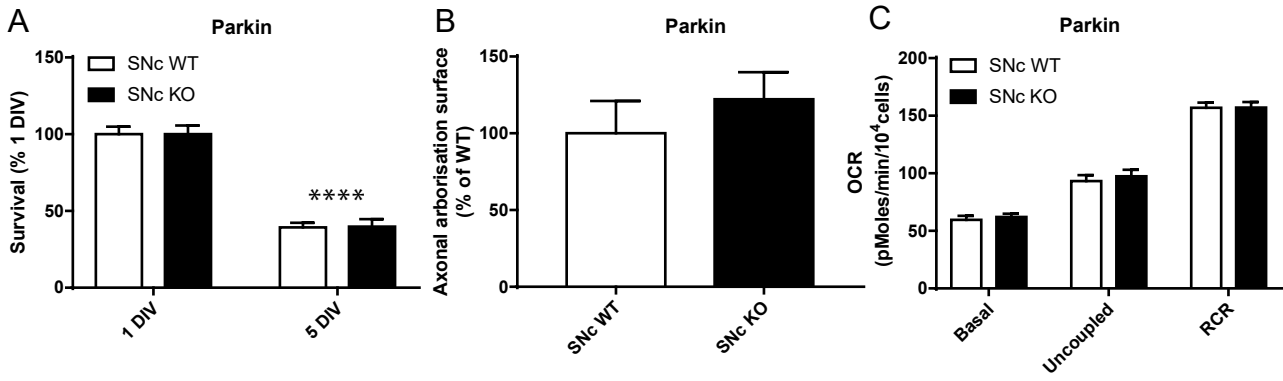

Figure S3

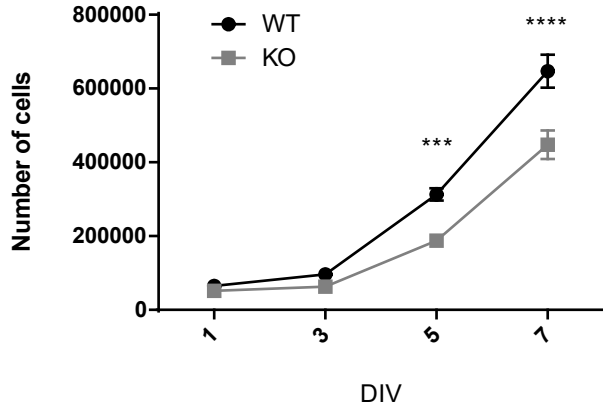

Figure S4

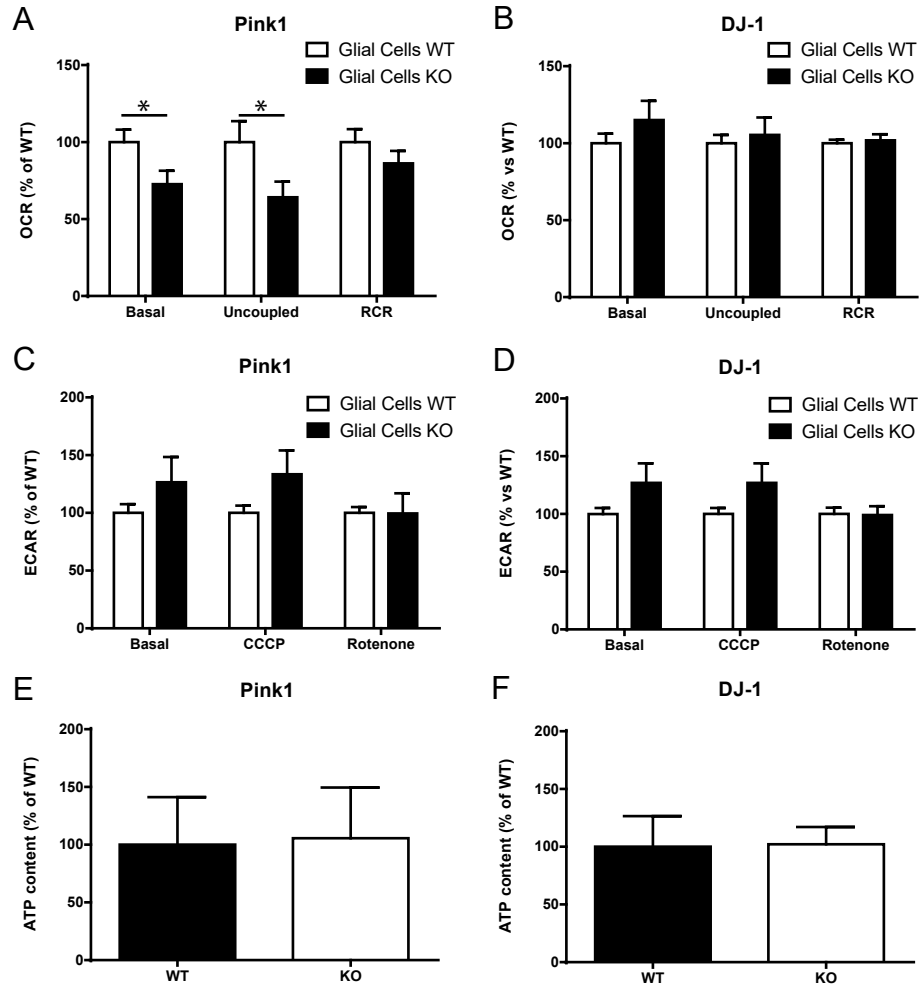

Figure S5

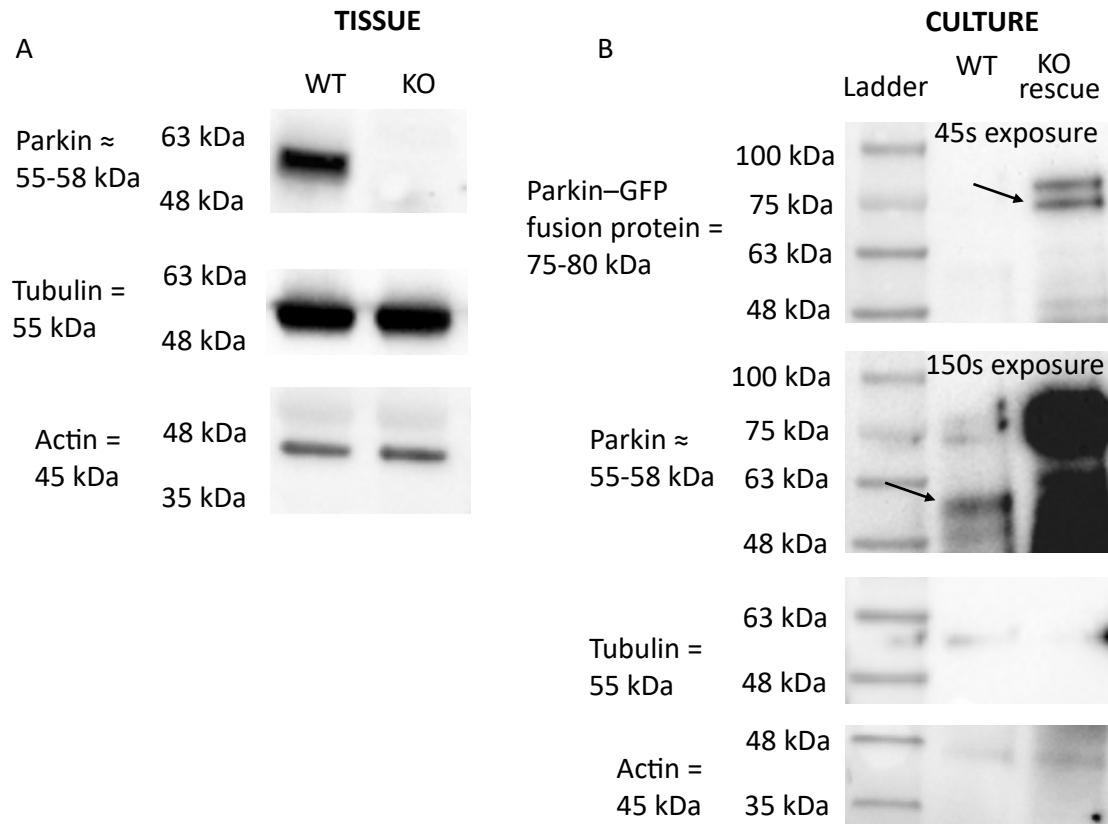

**FIGURE S1.** OCR (A), ATP content (B) and axonal arborization surface (C) of SNc and VTA DA neurons pooled from the WT non-normalized data from Parkin, Pink1 and DJ-1 cultures. OCR (A) was measured using a XF24 Analyzer from all WT SNc and VTA cultures. The values represent the mean  $\pm$  SEM,  $n = 39-78$  wells from at least 12 different cultures.  $**p < 0.01$ . ATP content under basal conditions was quantified in all WT SNc and VTA cultures. The values represent the mean  $\pm$  SEM,  $n = 19-20$  coverslips from at least 9 different cultures  $***p < 0.001$ . (C) Axonal arborization size was measured removing MAP2 signal surface from TH signal surface in random fields. The values obtained were normalized to the number of TH-positive SNc or VTA DA neurons in all WT cultures. The values represent the mean  $\pm$  SEM,  $n = 46-47$  coverslips from at least 9 different cultures.  $***p < 0.001$ .

**FIGURE S2.** Parkin WT and KO SNc cultures at 5 DIV (A) Basal survival rate was measured by counting the proportion of DA neurons with a clear round nucleus at 1 DIV that survived until 5 DIV. (B) Axonal arborization size was measured by removing somatodendritic (MAP2 signal) surface from TH surface in random fields. Data were normalized by the control condition. The values represent the mean  $\pm$  SEM,  $n = 20-24$  coverslips from at least 3 different cultures.  $*p < 0.05$ ,  $***p < 0.001$ . (C) Oxygen consumption rates (OCR) were measured using a XF24 Analyzer. Basal OCR, uncoupled OCR in the presence of 0.5 mM CCCP and the respiratory control ratio (RCR), calculated by dividing uncoupled by basal OCR, were measured. Data were normalized to the control condition. The values represent the mean  $\pm$  SEM,  $n = 18-21$  wells from at least 3 different cultures.  $****p < 0.0001$ .

**FIGURE S3.** Mesencephalic Parkin KO glial cells were grown for 1, 3, 5 and 7 DIV. The number of glial cells was measured by DAPI staining. The values represent the mean  $\pm$  SEM,  $n = 12$  coverslips from at least 3 different cultures.  $***p < 0.001$ ,  $****p < 0.0001$ .

**FIGURE S4.** OCR (A-B) and ECAR (C-D) were measured using a XF24 Analyzer from Pink1 (A, C) and DJ-1 (B, D) glial cell cultures. The values represent the mean  $\pm$  SEM,  $n = 16-21$  wells from at least 4 different cultures.  $*p < 0.05$ . ATP content under basal conditions was quantified in Pink1 (E) and DJ-1 (F) glial cell cultures. The values represent the mean  $\pm$  SEM,  $n = 7$  coverslips from at least 3 different cultures.

**FIGURE S5.** Parkin expression was measured by western blot in Parkin WT and KO P0 mouse brain tissue (A) and in Parkin WT and KO (with Parkin-GFP AAV rescue) SNc cultures. (B). Parkin overexpression in cultures was strong (B top, arrow), and the presence of the second band is likely due to parkin's ability to self-ubiquitinate. It was necessary to increase blot exposure to reveal the WT band in the WT culture condition (B middle, arrow). The bands for reference genes are weak for cultures because the amount of material obtained from culture coverslips is limited (B bottom). Antibodies used were anti-Parkin mouse 1:200 (sc-32282, Santa Cruz Biotechnology), anti- $\alpha/\beta$ -Tubulin rabbit 1: 1000 (2148S, Cell Signaling Technology) and anti- $\beta$ -Actin mouse 1:2500 (ab6276, Abcam).
